# Supplementary material for: Characterization of the tandem CWCH2 sequence motif: a hallmark of inter-zinc finger interactions
Source: Springer Nature journal article supplement (doi:10.1186/1471-2148-10-53), 2010-01-01

**A**

| Distance | ZF1            |                |                |
|----------|----------------|----------------|----------------|
|          | ZIC3<br>(W255) | GLI1<br>(W239) | Zap1<br>(W583) |
| 3Å       | H286           | H260           | H604           |
| 4Å       | C268           | C237           | C581           |
|          | V282*          | H271           | C586           |
|          | H286           | W272           | L600*          |
|          | V287           | M292*          | N619           |
|          | C297           | W620           | W620           |
| 5Å       | C253           | C242           |                |
|          | D257           | I256*          |                |
|          | Y298           | I261           |                |
|          | W299           | C270           |                |
|          | I319*          | L288           |                |

| Distance | ZF2            |                |                |
|----------|----------------|----------------|----------------|
|          | ZIC3<br>(W299) | GLI1<br>(W272) | Zap1<br>(W620) |
| 3Å       | H322           | R238           | H641           |
| 4Å       | V282*          | C237           | K582           |
|          | C297           | W239           | W583           |
|          | C302           | C270           | L600*          |
|          | H322           | M292*          | C618           |
|          |                | H295           | C623           |
|          |                | I637*          |                |
| 5Å       | C253           | L252           | E621           |
|          | K254           | I256*          |                |
|          | W255           | C275           |                |
|          | E300           | T296           |                |
|          | I319           |                |                |

**B**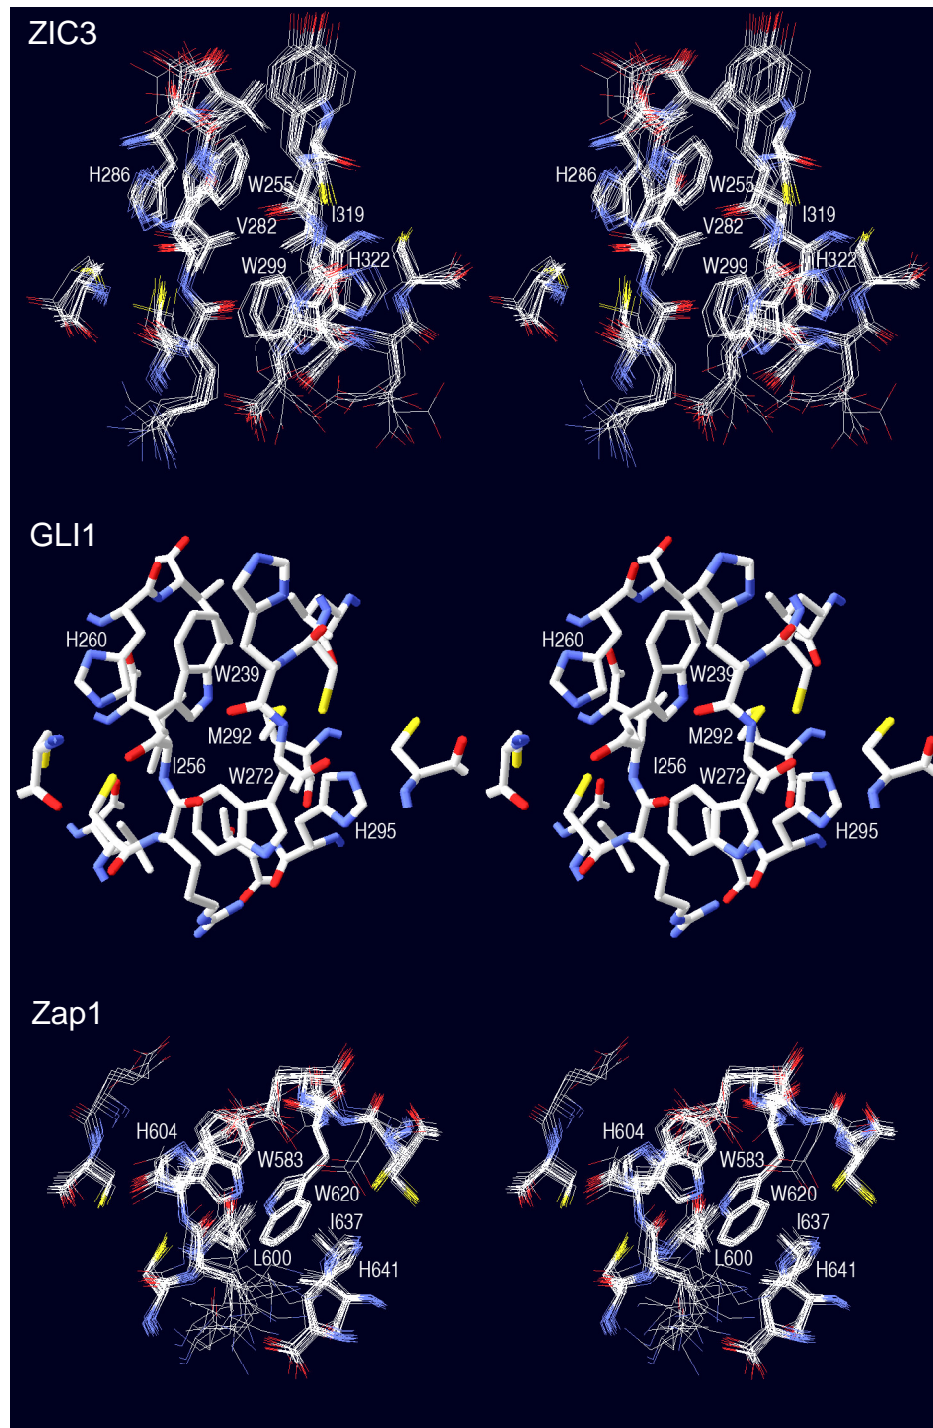

Supplement: Additional file 1 [file 1471-2148-10-53-s1.pdf]
