# Supplementary figures and images for: Characterization of the tandem CWCH2 sequence motif: a hallmark of inter-zinc finger interactions
Source: Springer Nature journal article supplement (doi:10.1186/1471-2148-10-53), 2010-01-01

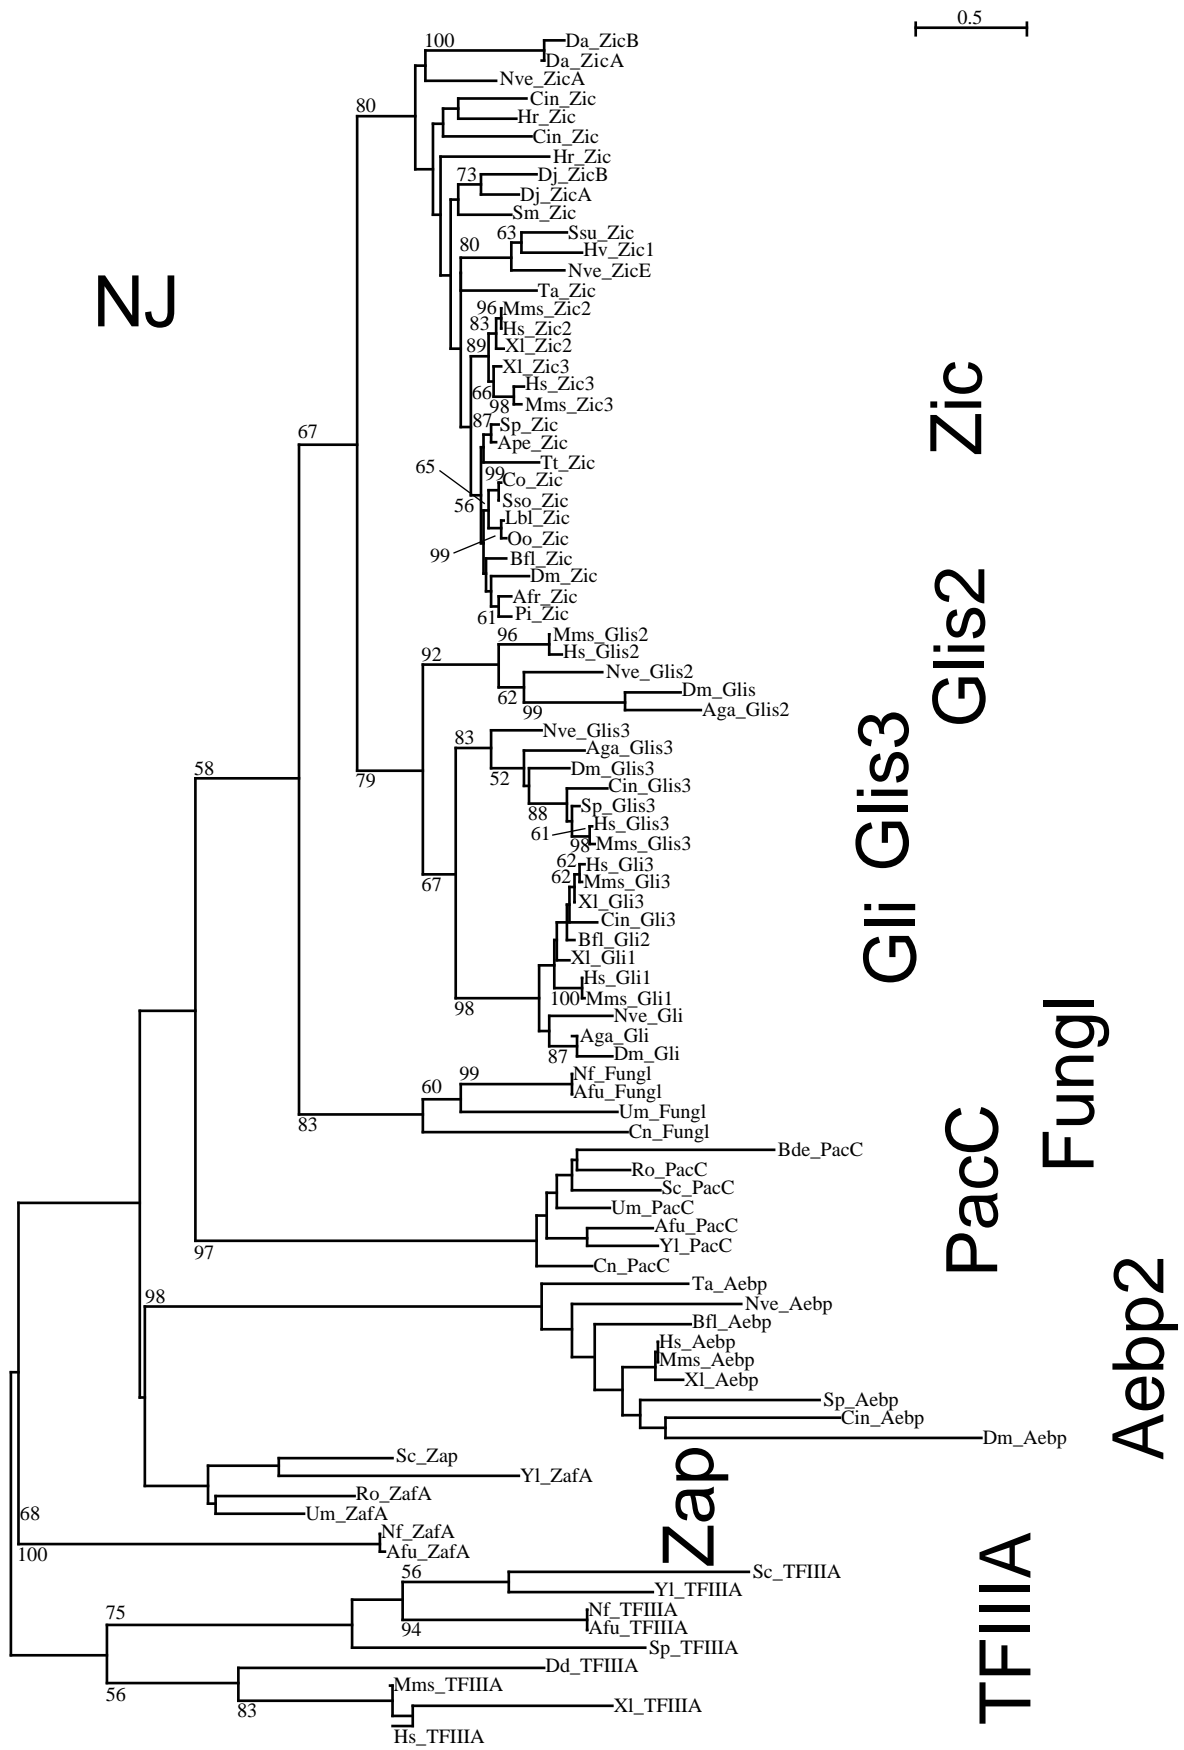

Supplement: Additional file 14 [file 1471-2148-10-53-s14.pdf]
